# Opioid Tolerance Blunts the Reduction in the Sevoflurane Minimum Alveolar Concentration Produced by Remifentanil in the Rat

Ignacio A. Gómez de Segura, D.V.M.,\* Javier Benito de la Vibora, D.V.M.,† Delia Aguado, D.V.M.‡

**Background:** Acute opioid tolerance is a known entity leading to reduced analgesic efficacy of these drugs in the postoperative period. However, the development of acute opioid tolerance in the very short term, *i.e.*, during the intraoperative period when opioids are being administered, has not been reported. Therefore, the aim of this study was to determine if acute opioid tolerance could develop and limit the opioid-induced reduction in the minimum alveolar concentration (MAC) for inhalant anesthetics.

**Methods:** Male Wistar rats were randomly allocated to receive two doses of remifentanil (120 and 240  $\mu\text{g} \cdot \text{kg}^{-1} \cdot \text{h}^{-1}$ ) under sevoflurane anesthesia, and the sevoflurane MAC was determined before and at two time intervals afterwards. In a second experiment, the low dose of remifentanil was increased once an acute opioid tolerance effect was observed. The sevoflurane MAC was determined from alveolar gas samples at the time of tail clamp.

**Results:** A remifentanil constant rate of infusion dose-dependently reduced the sevoflurane MAC from 2.4 to  $1.8 \pm 0.2$  vol% and from  $2.3 \pm 0.3$  vol% to  $1.5 \pm 0.3$  vol%, at the low and high doses, respectively. However, 90 min later, when the sevoflurane MAC was redetermined, the observed reduction was blunted to nearly 50% of the previous sevoflurane MAC values. When this acute opioid tolerance effect was observed with the low dose, the sevoflurane MAC reduction originally achieved could be regained by doubling the dose; *i.e.*, giving the high dose.

**Conclusions:** Remifentanil efficacy in reducing the sevoflurane MAC diminishes within a short term, suggesting that increased opioid doses may be required to maintain intraoperative analgesia during sevoflurane anesthesia.

REMIFENTANIL is a potent short-acting opioid characterized by a rapid recovery despite the dose or time of infusion and, therefore, additional opioids are commonly given before discontinuing a remifentanil infusion to prevent pain in the postoperative period. However, there is evidence indicating that the dose required to prevent pain postoperatively is higher than expected, and this has been associated with acute opioid tolerance and opioid-induced hyperalgesia.<sup>1</sup>

Opioid tolerance after the administration of drugs such as morphine has been known for many years.<sup>2</sup> After the

introduction of remifentanil in perioperative use, several reports have emphasized the potential for acute opioid tolerance and opioid-induced hyperalgesia in the postoperative period, characterized by increased postoperative pain and morphine consumption.<sup>3</sup> Acute opioid tolerance has been widely documented in animals for almost 40 yr<sup>4,5</sup> and has also recently been associated with the administration of short-acting and relatively high opioid doses to rats.<sup>6-9</sup>

Studies performed in human volunteers showed the development of acute opioid tolerance to the analgesic action of remifentanil only a few hours after the initiation of its administration *via* continuous infusion, suggesting a need to recalculate the dose administered postoperatively.<sup>10-13</sup> However, a lack of a tolerance effect to remifentanil has been reported, mostly in surgical patients in the postoperative period.<sup>14-17</sup>

Surprisingly, there are no studies that actually determine if acute opioid-induced tolerance or opioid induced hyperalgesia do occur over the very short term during the intraoperative period, limiting the intraoperative analgesic efficacy of opioids. Since studies in volunteers have observed the appearance of acute opioid tolerance within only 60 to 90 min after initiating a remifentanil infusion,<sup>13</sup> it has been suggested that intraoperative analgesia levels may decrease afterwards, and this reduction could become clinically relevant in longer surgeries.

An indirect, although clinically valuable method to determine the analgesic potency of opioids in the intraoperative period is the determination of the minimum alveolar concentration (MAC) of an inhalant anesthetic. We hypothesized that the decrease in the effectiveness of remifentanil-induced reduction in the sevoflurane MAC could occur within a relatively short time; *i.e.*, the onset of acute tolerance to remifentanil might occur before surgery is finished.

## Materials and Methods

After obtaining Institutional Animal Care Committee approval (Madrid, Spain), the reduction in the sevoflurane MAC in response to remifentanil given in continuous infusion was evaluated in rats. Sevoflurane was obtained from Abbott (Sevorane; Abbott Laboratories, Madrid, Spain), and remifentanil from Glaxo-Wellcome (Ultiva; Glaxo-Wellcome Laboratories, Madrid, Spain).

Fifty-two male Wistar rats (Charles River Laboratories, Barcelona, Spain) with an average weight of 391 g (SD,

\* Professor, ‡ Research Fellow, Department of Animal Medicine and Surgery, Universidad Complutense, Madrid, Spain. † ECLAM Resident, Department of Experimental Surgery, La Paz University Hospital, Madrid, Spain.

Received from the Department of Animal Medicine and Surgery, Universidad Complutense, Madrid, Spain. Submitted for publication August 5, 2008. Accepted for publication December 18, 2008. Supported by Projects FIS PI050441 and PI080422 from the Fondo de Investigaciones Sanitarias, Spanish Health Ministry, Madrid, Spain. Presented at Euroanesthesia 2008, Copenhagen, Denmark, May 31, 2008.

Address correspondence to Dr. Gómez de Segura: Department of Animal Medicine and Surgery, Universidad Complutense de Madrid, Avda. Puerta de Hierro s/n, 28040 Madrid, Spain. iagsegura@vet.ucm.es. Information on purchasing reprints may be found at [www.anesthesiology.org](http://www.anesthesiology.org) or on the masthead page at the beginning of this issue. ANESTHESIOLOGY's articles are made freely accessible to all readers, for personal use only, 6 months from the cover date of the issue.

67 g), were housed in groups of 4 to 6 with a 12-h light, 12-h dark cycle; a relative humidity of 50 to 70%; and  $20 \pm 2^\circ\text{C}$  ambient temperature. Food (B&K Universal, Grimston, England) and water were provided *ad libitum*. The animals were allowed to acclimatize for at least 1 week. All the studies were performed during the morning (starting at 9:00 AM).

The rats were placed in an induction chamber into which 8% sevoflurane in a continuous oxygen flow of 3 l/min was directed (Sevoflurane Vaporizer, Sevorane Dräger Vapor 2000, Lübeck, Germany). After 2 to 3 min, the inhaled sevoflurane concentration was reduced to 3 to 5%. Tracheal intubation was performed using a 14-gauge polyethylene catheter (Terumo Surflo IV Catheter, Terumo Europe NV, Leuven, Belgium) with the animal positioned in sternal recumbency. A flexible, blunt-tip wire guide was inserted into the trachea with an otoscope and used to direct the endotracheal catheter. After positioning of the catheter was ascertained, it was connected to a small T piece breathing system with minimum dead space. Fresh gas flow to the T piece was adjusted to 1 l/min oxygen, and sevoflurane concentration was adjusted as necessary. Remifentanyl was administered with an infusion pump (Syringe pump, model Sep11S, Ascor S.A. Medical Equipment, Warsaw, Poland) by means of a 22-gauge polyethylene catheter inserted in a tail vein.

### Monitoring

Heart and respiratory rates were continuously monitored. Arterial blood pressure, pulseoxymetry, and heart and respiratory rates were recorded immediately before each MAC step, and after 30 min of drug administration. The carotid artery was catheterized (Venocath-18, Veni-systems, Abbott, Sligo, Ireland) *via* surgical cutdown. This access allowed arterial blood sampling and blood pressure measurement *via* a calibrated pressure transducer (Transpac IV; Abbott Laboratories, Abbott Park, IL). Systolic, diastolic, and mean arterial blood pressures were recorded continuously (RGB Medical Devices, Madrid, Spain). Arterial blood (1 ml) was collected for blood gas analysis (Rapidlabs 860; Bayer AG, Leverkusen, Germany) at the end of the study to ensure that the values (at that time point) were within normal limits of pH (7.34–7.44), and oxygen ( $P_{\text{aO}_2}$ ;  $> 90$  mmHg), and carbon dioxide arterial partial pressures below 55 mmHg ( $P_{\text{aCO}_2}$ ; 35–55 mmHg). Rectal temperature was also monitored and maintained between  $37.0^\circ\text{C}$  and  $38.5^\circ\text{C}$  by means of a water-circulating warming blanket (Heat Therapy Pump, Model TP-220; Gaymar, Orchard Park, NY). A heating light was also used when necessary to maintain body temperature above  $37.0^\circ\text{C}$ .

### Determination of the MAC

Intratracheal gas sampling was used to measure anesthetic gas concentration and determine the MAC. This

method has been described in detail previously.<sup>18</sup> In brief, a fine catheter with an 0.9-mm external diameter was inserted through the endotracheal catheter, with the fine catheter tip located at the level of the carina. The proximal end of the catheter was connected to a 10-ml gas-tight glass syringe (Hamilton Syringe, 1000 Series Gastight, model 26211-U; Sigma-Aldrich, St. Louis, MO). Samples were obtained by withdrawing 10 ml of gas over 5 min using an infusion pump (Mod. 55-2226; Harvard Apparatus, Millis, MA). Gas sampling actually mixed both alveolar and inspired gases, which were obtained consecutively in duplicate to ensure a constant alveolar concentration, and the final value was the mean, at every sevoflurane concentration step. The fine catheter was withdrawn between samples. After every step change in anesthetic concentration delivered by the anesthetic circuit, at least 10 min were allowed for equilibration before tail clamping. The samples were assayed using a side-stream infrared analyzer (Capnomac Ultima; Datex-Ohmeda, Hertfordshire, England).

The MAC of sevoflurane ( $\text{MAC}_{\text{SEV}}$ ) and the MAC of sevoflurane plus remifentanyl at a constant rate of infusion were established according to the method described elsewhere.<sup>19</sup> A painful noxious stimulus was applied with a long hemostat (8-inch Rochester Dean Hemostatic Forceps, Martin, Tuttlingen, Germany) clamped to the first ratchet lock onto the tail for 60 s immediately after the gas sample was obtained from the trachea. The tail was always stimulated proximal to a previous test site when the previous response was negative or distal if response was positive, starting 6 cm distal to the tail base. A positive response was considered to be a gross purposeful movement of the head, extremities, or body. A negative response was considered to be the lack of movement or grimacing, swallowing, chewing, or tail flick. Where a negative response was seen, the sevoflurane concentration was then reduced in decrements of 0.2% until the negative response became positive. Similarly, where a positive response was seen, the sevoflurane concentration was then increased until the positive response became negative. The MAC was considered to be the concentration midway between the highest concentration that permitted movement in response to the stimulus and the lowest concentration that prevented such movement. Determination of the MAC was performed in a laboratory 600 m above sea level.

### Experimental Design

The  $\text{MAC}_{\text{SEV}}$  was determined four times in every animal. Once the animals were anesthetized and instrumented, a baseline  $\text{MAC}_{\text{SEV}}$  was determined, and each animal acted as its own control. Remifentanyl (RMF) was given intravenously by continuous infusion in the tail vein with no loading dose and the MAC was determined then (RMF-1), and again approximately 90 min later (RMF-2). Finally, the remifentanyl infusion was stopped

and the MAC redetermined (PostRMF). Thirty minutes were allowed between MAC determinations, and 1 h was usually necessary to determine the MAC value. Overall, every experiment lasted between 6 and 7 h. No attempt was made to determine the existence of an opioid-induced hyperalgesia effect when baseline MAC<sub>SEV</sub> was regained. In a further experiment, the dose of remifentanyl was increased once an acute opioid tolerance effect was observed (RMF-3), and in these rats the MAC<sub>SEV</sub> was determined five times.

### Drug Groups

Baseline MAC<sub>SEV</sub> was determined in all animals before starting the opioid infusion. The animals were randomly given 1 of 2 doses of remifentanyl at a constant rate of infusion, 120  $\mu\text{g} \cdot \text{kg}^{-1} \cdot \text{h}^{-1}$  ( $n = 14$ ) and 240  $\mu\text{g} \cdot \text{kg}^{-1} \cdot \text{h}^{-1}$  ( $n = 14$ ). The animals were euthanized with potassium chloride given intravenously while still deeply anesthetized. In a further group ( $n = 19$ ), the rats were given 120  $\mu\text{g} \cdot \text{kg}^{-1} \cdot \text{h}^{-1}$  and, once the MAC values determination indicated an acute opioid tolerance effect, the remifentanyl dose was increased to 240  $\mu\text{g} \cdot \text{kg}^{-1} \cdot \text{h}^{-1}$  and the MAC value reassessed (RMF-3).

A pilot study ( $n = 5$ ) was performed to ensure that the MAC value was not modified over time. Therefore, the MAC<sub>SEV</sub> was determined at the four different studied times of the first experiment, but while administering saline instead of remifentanyl.

### Statistical Analysis

Sample size calculation (N Query Advisor 2.0; Statistical Solutions; Saugus, MA) indicated an  $n$  value of 14 to determine differences as a result of an opioid tolerance effect with both remifentanyl constant infusion rate doses. However, a larger  $n$  value ( $n = 19$ ) was necessary to establish these differences in the second experiment.

A two-way ANOVA (dose  $\times$  time) for repeated measures was performed, with the intrasubject factor being time and the intersubject factor being dose. Since an interaction between dose and time was found ( $P = 0.004$ , Greenhouse-Geisser correction) a one-way ANOVA for repeated measures (intrasubject factor being time) was performed for dose = 120  $\mu\text{g} \cdot \text{kg}^{-1} \cdot \text{h}^{-1}$  and for dose = 240  $\mu\text{g} \cdot \text{kg}^{-1} \cdot \text{h}^{-1}$ . Student's  $t$  test was employed using dose (120  $\mu\text{g} \cdot \text{kg}^{-1} \cdot \text{h}^{-1}$  and 240  $\mu\text{g} \cdot \text{kg}^{-1} \cdot \text{h}^{-1}$ ) as factor to determine differences between the two doses at each study time. A  $P$  value of  $< 0.05$  was set to indicate statistical significance. All analyses were performed using the SPSS statistical package (v. 15 for Windows; SPSS Inc., Chicago, IL). Results are presented as mean  $\pm$  SD.

## Results

The MAC<sub>SEV</sub> ranged from 1.7 to 2.8%, with an average value of  $2.3\% \pm 0.3\%$ .

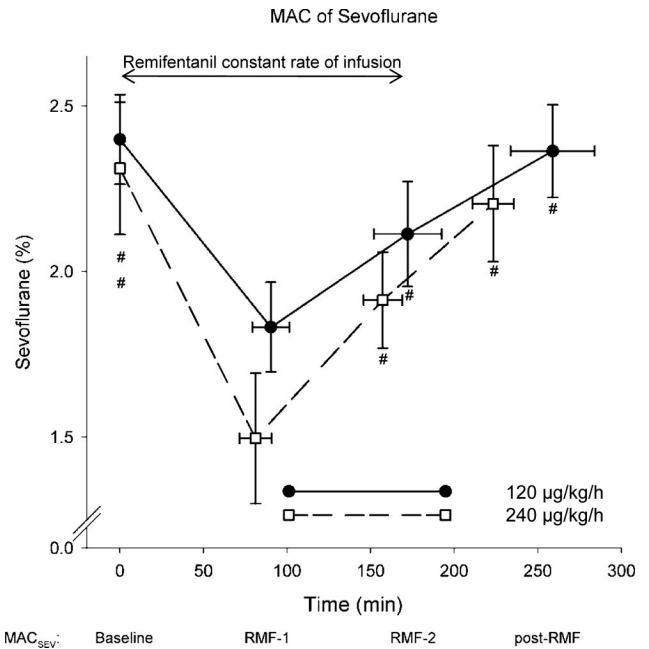

**Fig. 1.** Sevoflurane minimum alveolar concentration (MAC) in rats given a remifentanyl constant rate of infusion. Baseline sevoflurane MAC was determined before and approximately 1.5 h Remifentanyl (RMF-1) and 3 h (RMF-2) after starting a continuous remifentanyl infusion rate at either 120  $\mu\text{g} \cdot \text{kg}^{-1} \cdot \text{h}^{-1}$  or 240  $\mu\text{g} \cdot \text{kg}^{-1} \cdot \text{h}^{-1}$ . Once the infusion was stopped, the sevoflurane MAC was redetermined (PostRMF). Data are expressed as mean  $\pm$  SD. # Significant differences with RMF-1. (Analysis of variance [ANOVA] repeated measures,  $P < 0.05$ ).

### The Magnitude of Sevoflurane MAC Reduction Produced by Remifentanyl Diminishes in the Short Term

Baseline sevoflurane MAC in rats was similar in both dose groups of remifentanyl ( $P > 0.05$ , effect size = 0.297); *i.e.*,  $2.4 \pm 0.2$  vol% ( $n = 14$ , mean  $\pm$  SD; 120  $\mu\text{g} \cdot \text{kg}^{-1} \cdot \text{h}^{-1}$ ), and  $2.3 \pm 0.3$  vol% ( $n = 14$ , 240  $\mu\text{g} \cdot \text{kg}^{-1} \cdot \text{h}^{-1}$ ). When a constant rate of infusion for remifentanyl was used, it reduced the MAC values (RMF-1) in a dose-dependent fashion to  $1.8 \pm 0.2$  vol% and  $1.5 \pm 0.3$  vol%, at the low and high doses, respectively (ANOVA,  $P < 0.05$ ; effect size = 1.004); *i.e.*, a percentage of reduction in the MAC<sub>SEV</sub> by  $24 \pm 6$  vol% and  $36 \pm 7$  vol%, respectively. These results were obtained approximately 1.5 h after the baseline MAC<sub>SEV</sub> determination; *i.e.*, at 90 min and 81 min (low and high doses of remifentanyl, respectively) after starting the remifentanyl constant rate of infusion (fig. 1).

Approximately 1 h and 30 min later, the MAC values were redetermined (RMF-2) and found to be higher than those previously observed (RMF-1), even though the same remifentanyl constant rate of infusion had been maintained; *i.e.*,  $2.1 \pm 0.3$  vol% and  $1.9 \pm 0.3$  vol% at the low and high dose of remifentanyl, respectively (ANOVA,  $P > 0.05$ ; effect size = 0.721). These values actually only reduced the baseline MAC<sub>SEV</sub> by  $12 \pm 7\%$  and  $17 \pm 9\%$ , at the low and high dose of remifentanyl, respectively, with an increase over the earlier measurements, also



with the remifentanyl infusion (RMF-1), of  $12 \pm 5\%$  and  $9 \pm 12\%$ . These results were obtained 89 min and 76 min after the previous MAC determination (RMF-1), or 179 min and 157 min after the start of the remifentanyl infusion, at the low and high doses, respectively.

After the second sevoflurane MAC determination with remifentanyl (RMF-2), the remifentanyl infusion was stopped. Then the sevoflurane MAC values for both infusion rate groups were determined again (PostRMF) and found to be higher than the previous MAC determination (RMF-2); *i.e.*,  $2.4 \pm 0.2$  vol% for the low dose and  $2.2 \pm 0.3$  vol% for the high dose (ANOVA,  $P > 0.05$ ; effect size = 0.562). These results were obtained 4 to 5 h after starting the remifentanyl infusions. No significant differences were found between the first and fourth MAC determinations; *i.e.*, MAC<sub>SEV</sub> without remifentanyl infusion.

All study times were significantly different when compared with the previous or following study time ( $P < 0.001$ , Greenhouse-Geisser correction) at both doses,  $120 \mu\text{g} \cdot \text{kg}^{-1} \cdot \text{h}^{-1}$  and  $240 \mu\text{g} \cdot \text{kg}^{-1} \cdot \text{h}^{-1}$ . These differences were found at every time interval: Baseline-RMF-1,  $P < 0.001$  for both doses; RMF-1-RMF-2,  $P < 0.001$  for both doses; RMF-2-postRMF  $P < 0.002$  with dose =  $120 \mu\text{g} \cdot \text{kg}^{-1} \cdot \text{h}^{-1}$  and  $P < 0.001$  with dose =  $240 \mu\text{g} \cdot \text{kg}^{-1} \cdot \text{h}^{-1}$ . A dose-dependent effect of remifentanyl was found at RMF-1 (Student's *t* test,  $P = 0.006$ ), but not at RMF-2 ( $P = 0.055$ ). No differences between doses were found at baseline and postRMF ( $P = 0.442$  and  $P = 0.140$ , respectively).

Results from the pilot experiment showed no differences over time, and variation was within the normal range for the MAC determination method (10–15%):  $2.2 \pm 0.1$  vol%,  $2.3 \pm 0.2$  vol%,  $2.2 \pm 0.1$  vol%, and  $2.2 \pm 0.2$  vol% at baseline, RMF-1, RMF-2, and postRMF times, respectively.

#### *An Acute Opioid Tolerance Effect Is Determined Although Opioid-induced Hyperalgesia Cannot Be Ruled Out*

While the degree of reduction in the MAC<sub>SEV</sub> ( $2.3 \pm 0.3$  vol%) produced by remifentanyl (RMF-2,  $1.8 \pm 0.3$  vol%) decreased over time (RMF-2,  $2.1 \pm 0.3$  vol%), the initial reduction (RMF-1) could be reattained by increasing the remifentanyl dose from  $120 \mu\text{g} \cdot \text{kg}^{-1} \cdot \text{h}^{-1}$  to  $240 \mu\text{g} \cdot \text{kg}^{-1} \cdot \text{h}^{-1}$  (RMF-3,  $1.5 \pm 0.3$  vol%). This observation demonstrates an acute opioid tolerance effect since, if the MAC<sub>SEV</sub> had risen, it would have been a consequence of opioid-induced hyperalgesia. The remifentanyl dose was not doubled from 240 to  $480 \mu\text{g} \cdot \text{kg}^{-1} \cdot \text{h}^{-1}$  to counteract the induced remifentanyl tolerance, because the latter dose produced severe respiratory depression in the rats. These results were obtained 5 to 6 h after starting the remifentanyl infusion (fig. 2).

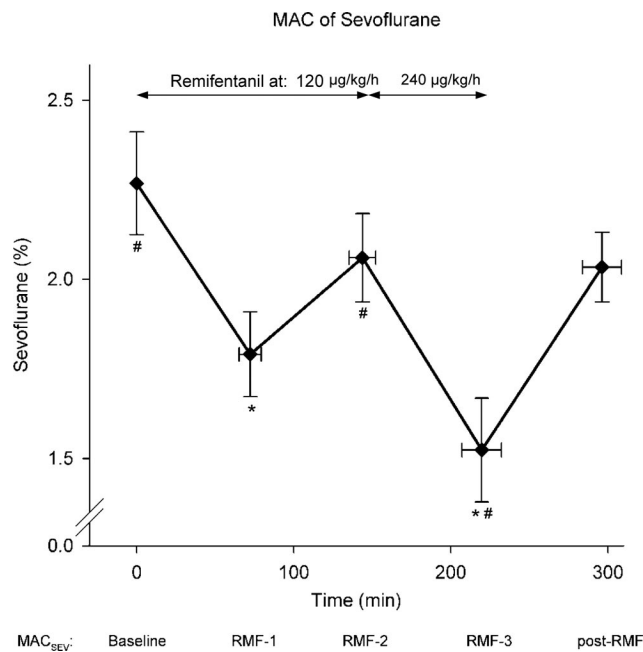

**Fig. 2.** Sevoflurane minimum alveolar concentration (MAC) in rats given a remifentanyl constant rate of infusion. Baseline sevoflurane MAC was determined before and approximately 1.5 h Remifentanyl (RMF-1) and 3 h (RMF-2) after starting a continuous remifentanyl infusion rate of  $120 \mu\text{g} \cdot \text{kg}^{-1} \cdot \text{h}^{-1}$ . Once a tolerance effect was observed (RMF-2), the remifentanyl dose was increased to  $240 \mu\text{g} \cdot \text{kg}^{-1} \cdot \text{h}^{-1}$  and the sevoflurane MAC redetermined (RMF-3). Once the infusion was stopped, the sevoflurane MAC was again determined (postRMF). Data are expressed as mean  $\pm$  SD. \* Significant differences with baseline MAC<sub>SEV</sub>. # Significant differences with RMF-1. (Analysis of variance [ANOVA] repeated measures,  $P < 0.05$ ).

## Discussion

Like other potent opioids, remifentanyl reduces the sevoflurane MAC in the rat in a dose-dependent fashion.<sup>20</sup> However, this reduction is not constant and is rapidly blunted in the short term, since a significant reduction is observed some 1.5 h after beginning the remifentanyl infusion. This finding is consistent with previous reports reflecting the rapid development of acute opioid tolerance to remifentanyl in people in the immediate postoperative period,<sup>3,21</sup> although the opposite, *i.e.*, a lack of an acute opioid tolerance effect, has also been reported, mostly in postsurgical patients.<sup>14–17</sup> Similarly, an acute opioid tolerance effect<sup>13</sup> and opioid-induced hyperalgesia<sup>10</sup> have been observed in healthy volunteers receiving remifentanyl, possibly reflecting the importance of the surgical stimulus in the development of opioid-induced tolerance. Since increasing the remifentanyl infusion dose maintained the initial reduction in the MAC<sub>SEV</sub>, an acute opioid tolerance effect is suggested where increased doses were required to maintain the same level of analgesic effect.

The most commonly used method to determine acute opioid tolerance to remifentanyl during the postoperative period in the clinical setting is to measure the dose of opioid administered, as the amount of morphine re-

quired over 24 h postoperatively, usually through patient-controlled administration. This has proven to be a more consistent method since it is a relatively objective measurement, although large interindividual differences may occur, and this may reduce the reliability of the method. However, no attempts have been made as yet to demonstrate acute opioid tolerance in the intraoperative period when a reduction of the MAC under inhalation anesthesia would consistently reflect the analgesic effect of opioids.

When the acute opioid tolerance effect was observed, the reduction in the MAC of remifentanyl was roughly only 50% of the previous measurement. A similar or even stronger acute opioid tolerance effect has been described in conscious human volunteers in whom the analgesic effect declined, despite the constant rate of infusion, after 3 h of infusion to only one-fourth of the peak value, which had been observed 1 to 1.5 h after initiating the infusion,<sup>13</sup> and a threefold increase in pain scores was found as a result of acute opioid tolerance. Given the rapid development of acute opioid tolerance to remifentanyl, the MAC reduction determined immediately after starting the remifentanyl infusion may not reflect the maximum level of reduction potentially achieved, since it usually takes 80 to 90 min to determine MAC in rats. Similarly, tolerance might have been increased by allowing a longer intermeasurement period between MAC determinations during the remifentanyl infusion. The magnitude of the MAC change produced by remifentanyl is high enough as to be of clinical relevance, since either the dose of remifentanyl or the concentration of the inhalant anesthetic should be increased to maintain a similar level of anesthesia. Obviously this may lead to a potential increase in the appearance of side effects derived from higher doses of opioids and inhalant anesthetics. However, since contradictory findings have been reported in clinical trials,<sup>3,10-17,21</sup> caution should be taken when extrapolating these findings to the clinical setting, and further studies in humans are necessary to confirm the results observed in the rat.

Determination of the MAC usually provides more consistent results when a standardized supramaximal noxious stimulus is employed.<sup>22</sup> While surgical incision is usually employed in humans,<sup>23</sup> tail clamping is the most common and consistent noxious stimulus used in the rat.<sup>20</sup> MAC values remain stable for long periods of anesthesia and are typically reduced by opioids such as morphine, buprenorphine, fentanyl, or remifentanyl<sup>18,24</sup> in a dose-related fashion. Typical reductions range from 15 to 70%, although the doses employed in the rat are higher than in humans when comparing the mg per kg doses.<sup>25</sup> Accordingly, the reduction in the MAC value should be 20 to 30% when remifentanyl is administered at a dose of  $120 \mu\text{g} \cdot \text{kg}^{-1} \cdot \text{h}^{-1}$ , and 40 to 60% when the remifentanyl dose is doubled to  $240 \mu\text{g} \cdot \text{kg}^{-1} \cdot \text{h}^{-1}$ .<sup>20</sup>

MAC reductions of up to 90% can be obtained in humans<sup>26,27</sup> when large doses of opioids are administered.

Although there is evidence that different noxious stimuli may reflect a similar acute opioid tolerance response,<sup>13</sup> a differential response has been suggested; *i.e.*, temperature (heat or cold), mechanical or electrical, may affect responses so a modified response cannot be ruled out.<sup>11</sup> The noxious stimulus produced by surgery may actually elicit a different response, so the acute opioid tolerance effect produced by remifentanyl should be confirmed in a clinical setting. Thus the conflicting reports on the existence of a tolerance effect might be a consequence of, among other causes, the nociceptive stimulus employed.<sup>28</sup>

In conclusion, short term infusion, *i.e.*, 90 min or less, of remifentanyl at doses capable of decreasing the sevoflurane MAC in the rat actually decreases the effectiveness of the analgesic effect of the opioid. The observed effect would probably be a consequence of acute opioid tolerance and, if confirmed in humans, this loss of analgesic efficacy would have clinically significant implications.

The authors thank Dr. Enrique De Miguel, M.D., Head of the Experimental Surgery Department, La Paz University Hospital, Madrid, Spain, and Santiago Cano, Ph.D. in Mathematics, Research Support Service, University Complutense, Madrid, Spain.

## References

1. Angst MS, Clark JD: Opioid-induced hyperalgesia: A qualitative systematic review. *ANESTHESIOLOGY* 2006; 104:570-87
2. Ueda H, Inoue M, Mizuno K: New approaches to study the development of morphine tolerance and dependence. *Life Sci* 2003; 74:313-20
3. Guignard B, Bossard AE, Coste C, Sessler DI, Lebrault C, Alfonsi P, Fletcher D, Chauvin M: Acute opioid tolerance: Intraoperative remifentanyl increases postoperative pain and morphine requirement. *ANESTHESIOLOGY* 2000; 93:409-17
4. Martin WR, Eades CG: Demonstration of tolerance and physical dependence in the dog following a short-term infusion of morphine. *J Pharmacol Exp Ther* 1961; 133:262-70
5. Cox BM, Ginsburg M, Osman OH: Acute tolerance to narcotic analgesic drugs in rats. *Br J Pharmacol Chemother* 1968; 33:245-56
6. Kissin I, Brown PT, Bradley EL Jr: Magnitude of acute tolerance to opioids is not related to their potency. *ANESTHESIOLOGY* 1991; 75:813-6
7. Kissin I, Lee SS, Arthur GR, Bradley EL Jr: Time course characteristics of acute tolerance development to continuously infused alfentanil in rats. *Anesth Analg* 1996; 83:600-5
8. Gårdmark M, Ekblom M, Bouw R, Hammarlund-Udenaes M: Quantification of effect delay and acute tolerance development to morphine in the rat. *J Pharmacol Exp Ther* 1993; 267:1061-7
9. Kissin I, Brown PT, Robinson CA, Bradley EL Jr: Acute tolerance in morphine analgesia: Continuous infusion and single injection in rats. *ANESTHESIOLOGY* 1991; 74:166-71
10. Hood DD, Curry R, Eisenach JC: Intravenous remifentanyl produces withdrawal hyperalgesia in volunteers with capsaicin-induced hyperalgesia. *Anesth Analg* 2003; 97:810-5
11. Luginbühl M, Gerber A, Schnider TW, Petersen-Felix S, Arendt-Nielsen L, Curatolo M: Modulation of remifentanyl-induced analgesia, hyperalgesia, and tolerance by small-dose ketamine in humans. *Anesth Analg* 2003; 96:726-32
12. Tröster A, Sittl R, Singler B, Schmelz M, Schüttler J, Koppert W: Modulation of remifentanyl-induced analgesia and postinfusion hyperalgesia by parecoxib in humans. *ANESTHESIOLOGY* 2006; 105:1016-23
13. Vinik HR, Kissin I: Rapid development of tolerance to analgesia during remifentanyl infusion in humans. *Anesth Analg* 1998; 86:1307-11
14. Schraag S, Checketts MR, Kenny GN: Lack of rapid development of opioid tolerance during alfentanil and remifentanyl infusions for postoperative pain. *Anesth Analg* 1999; 89:753-7
15. Cortés LI, Brandes V, Muñoz HR, Guerrero ME, Mur M: No clinical evidence of acute opioid tolerance after remifentanyl-based anaesthesia. *Br J Anaesth* 2001; 87:866-9

16. Kucukemre F, Kunt N, Kaygusuz K, Kiliccioglu F, Gurelik B, Cetin A: Remifentanyl compared with morphine for postoperative patient-controlled analgesia after major abdominal surgery: A randomized controlled trial. *Eur J Anaesthesiol* 2005; 22:378-85
17. Lee LH, Irwin MG, Lui SK: Intraoperative remifentanyl infusion does not increase postoperative opioid consumption compared with 70% nitrous oxide. *ANESTHESIOLOGY* 2005; 102:398-402
18. Gomez de Segura IA, Criado AB, Santos M, Tendillo FJ: Aspirin synergistically potentiates isoflurane minimum alveolar concentration reduction produced by morphine in the rat. *ANESTHESIOLOGY* 1998; 89:1489-94
19. Eger EI 2nd, Saidman LJ, Brandstater B: Minimum alveolar anesthetic concentration: A standard of anesthetic potency. *ANESTHESIOLOGY* 1965; 26:756-63
20. Criado AB, Gomez de Segura IA: Reduction of isoflurane MAC by fentanyl or remifentanyl in rats. *Vet Anaesth Analg* 2003; 30:250-6
21. Crawford MW, Hickey C, Zaarour C, Howard A, Naser B: Development of acute opioid tolerance during infusion of remifentanyl for pediatric scoliosis surgery. *Anesth Analg* 2006; 102:1662-7
22. Eger EI 2nd, Johnson BH, Weiskopf RB, Holmes MA, Yasuda N, Targ A, Rampil IJ: Minimum alveolar concentration of I-653 and isoflurane in pigs: Definition of a supramaximal stimulus. *Anesth Analg* 1988; 67:1174-6
23. Katoh T, Ikeda K: The minimum alveolar concentration (MAC) of sevoflurane in humans. *ANESTHESIOLOGY* 1987; 66:301-3
24. Criado AB, Gómez de Segura IA, Tendillo FJ, Marsico F: Reduction of isoflurane MAC with buprenorphine and morphine in rats. *Lab Anim* 2000; 34:252-9
25. Lindstedt SL, Schaeffer PJ: Use of allometry in predicting anatomical and physiological parameters of mammals. *Lab Anim* 2002; 36:1-19
26. Lang E, Kapila A, Shlugman D, Hoke JF, Sebel PS, Glass PS: Reduction of isoflurane minimal alveolar concentration by remifentanyl. *ANESTHESIOLOGY* 1996; 85:721-8
27. Castanelli DJ, Splinter WM, Clavel NA: Remifentanyl decreases sevoflurane requirements in children. *Can J Anaesth* 2005; 52:1064-70
28. Gustorff B, Nahlik G, Hoerauf KH, Kress HG: The absence of acute tolerance during remifentanyl infusion in volunteers. *Anesth Analg* 2002; 94: 1223-8

## ANESTHESIOLOGY REFLECTIONS

### The Edison Etherizer

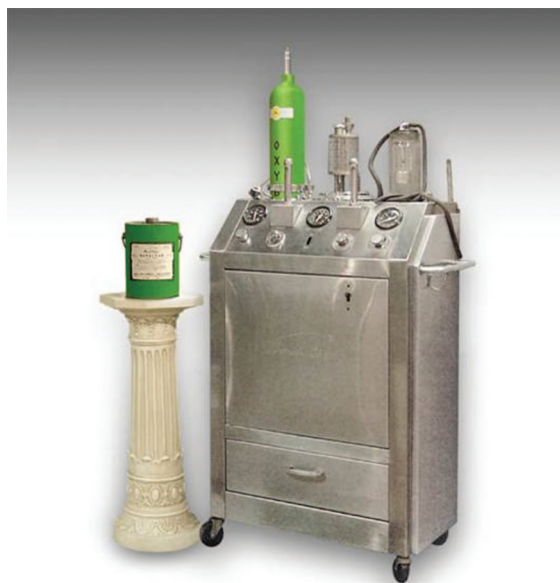

To electrify North America, Thomas A. Edison (1847–1931) proposed using direct current (D.C.) rather than the alternating current (A.C.) suggested by his rival, George Westinghouse, Jr. (1846–1914). To undermine acceptance of A.C. for household use, Edison terminally “Westinghoused” test animals in 1887 and then advocated similar use of A.C. upon death-row inmates. When the State of New York tried Edison’s “Westinghouse [electric] chair” in 1888, the first victim survived a 17-second electrocution before succumbing to a 72-second one. This debacle and D.C.’s economic costs backfired on Edison, and America adopted his rival’s A.C. Over a half century after the botched electrocution, Thomas A. Edison, Inc., of New Jersey manufactured an apparatus for passing “multitudinous air streams” through an ether-adsorbing “channeled carbon mass” whose heat-conducting container was surrounded by a “crystallizable liquid.” Heats of “adsorption and solidification,” designed into this apparatus by 1946, were counteracting the chill of vaporizing ether, the inefficiency of which had plagued earlier bubble-through vaporizers. After inscribing the signature of “Thomas A. Edison” on the front of their “Edison Etherizer” (pictured above from the Wood Library-Museum Gallery), the New Jersey team powered it with A.C. Quite an ironic posthumous salute to one-time D.C.-advocate, Thomas Alva Edison! – (Copyright © the American Society of Anesthesiologists, Inc. This image appears in color in the *Anesthesiology Reflections* online collection available at [www.anesthesiology.org](http://www.anesthesiology.org).)

*George S. Bause, M.D., M.P.H., Honorary Curator, ASA’s Wood Library-Museum of Anesthesiology, Park Ridge, Illinois, and Clinical Associate Professor, Case Western Reserve University, Cleveland, Ohio. UJYC@aol.com.*
